# Supplementary material
Source: Springer Nature journal article supplement (https://www.springermedizin.de/resource/supplementary/12958_2010_867_MOESM11_ESM.pdf/9569054)

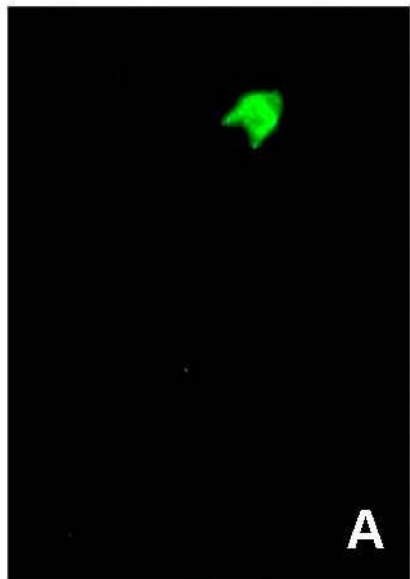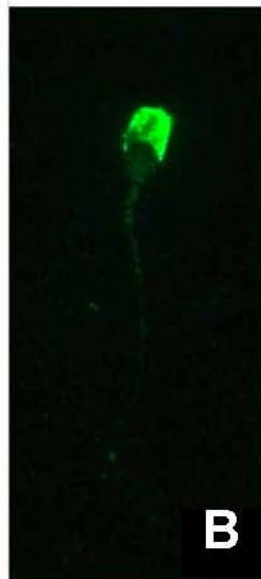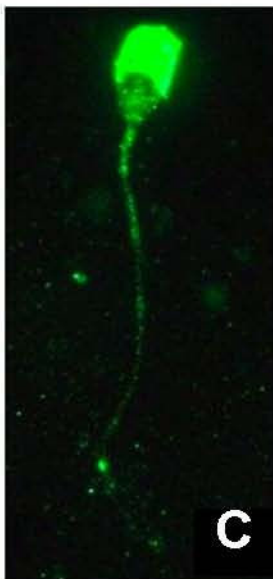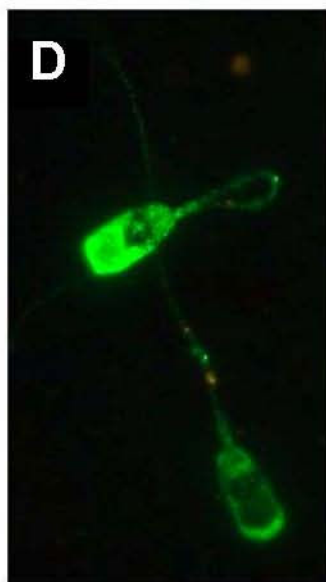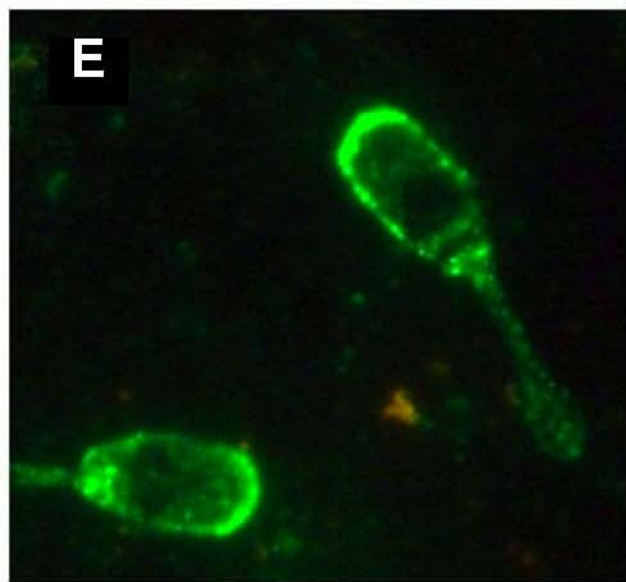

Supplement: MOESM11 [file 9569054]
